# Supplementary material for: Dissecting the role of the NADPH oxidase NOX4 in TGF-beta signaling in hepatocellular carcinoma
Source: PubMed Central journal article supplement — Redox Biol. 2023 Jul 13;65:102818. doi: 10.1016/j.redox.2023.102818 (PMC10372458; doi:10.1016/j.redox.2023.102818), 2023-07-13
Supplement: mmc2.pdf [file mmc2.pdf]

## **SUPPLEMENTARY TABLES**

### **Dissecting the role of the NADPH Oxidase NOX4 in TGF-beta signaling in hepatocellular carcinoma**

Rut Espinosa-Sotelo<sup>a,b</sup>, Noel P. Fusté<sup>a</sup>, Irene Peñuelas-Haro<sup>a,b</sup>, Ania Alay<sup>c,d</sup>, Gabriel Pons<sup>e</sup>, Xènia Almodóvar<sup>a</sup>, Júlia Albaladejo<sup>a</sup>, Ismael Sánchez-Vera<sup>e</sup>, Ricard Bonilla-Amadeo<sup>a</sup>, Francesco Dituri<sup>f</sup>, Grazia Serino<sup>f</sup>, Emilio Ramos<sup>b,g</sup>, Teresa Serrano<sup>b,h</sup>, Mariona Calvo<sup>i</sup>, María Luz Martínez-Chantar<sup>b,j</sup>, Gianluigi Giannelli<sup>f</sup>, Esther Bertran<sup>a,b</sup>, Isabel Fabregat<sup>a,b,\*</sup>.

**Supplementary Table 1. Clinico-pathological characteristics of HCC patients used in this study.**

| Patient ID | Liver pathology | Etiology | Tumor size (cm) | Histological grade | Status | Follow-up (months) | Relapse (Yes/No) |
|------------|-----------------|----------|-----------------|--------------------|--------|--------------------|------------------|
| 1          | Cirrhosis       | Alcohol  | 2               | 2                  | Death  |                    | No               |
| 2          | Cirrhosis       | Unknown  | 4.5             | 3                  | Death  | 45                 | Yes              |
| 3          | No Fibrosis     | Unknown  | 6               | 2                  | Death  | 45                 | No               |
| 4          | No Fibrosis     | Unknown  | 7               | 2                  | Death  | 43                 | No               |
| 5          | No Fibrosis     | Unknown  | 20              | 2                  | Death  | 12                 | Yes              |
| 6          | Cirrhosis       | VHC      | 4.5             | 4                  | Alive  | 98                 | No               |
| 7          | No Fibrosis     | Alcohol  | 2               | 2                  | Alive  | 86                 | No               |
| 8          | Cirrhosis       | VHC      | 5               | 3                  | Alive  | 81                 | Yes              |
| 9          | Cirrhosis       | VHC      | 2.1             | 3                  | Death  | 42                 | Yes              |
| 10         | No Fibrosis     | VHB      | 5.5             | 3                  | Alive  | 77                 | Yes              |
| 11         | Cirrhosis       | VHC      | 2               | 3                  | Alive  | 74                 | No               |
| 12         | Cirrhosis       | VHC      | 3.2             |                    | Alive  | 72                 | No               |
| 13         | No Fibrosis     | VHC      | 9.5             | 2                  | Alive  | 71                 | No               |
| 14         | Cirrhosis       | VHB      | 4.9             | 2                  | Alive  | 71                 | No               |
| 15         | Cirrhosis       | Alcohol  | 2.5             | 2                  | Death  | 57                 | Yes              |
| 16         | No Fibrosis     | VHC      | 2.9             | 2                  | Alive  | 70                 | No               |
| 17         | Cirrhosis       | VHC      | 1.2             | 2                  | Alive  | 65                 | Yes              |
| 18         | Cirrhosis       | Alcohol  | 26              | 2                  | Alive  | 61                 | Yes              |
| 19         | No Fibrosis     | Unknown  | 8               | 3                  | Alive  | 61                 | No               |
| 20         | Cirrhosis       | VHC      | 4.5             | 2                  | Alive  | 61                 | No               |
| 21         | Cirrhosis       | Alcohol  | 3.8             | 3                  | Alive  | 60                 | No               |
| 22         | Mild Fibrosis   | Unknown  | 4               | 2                  | Alive  | 59                 | No               |
| 23         | Mild Fibrosis   | VHC      | 1.2             | 3                  | Alive  | 59                 | No               |
| 24         | Cirrhosis       | VHC      | 1.8             | 1                  | Alive  | 59                 | No               |
| 25         | Mild Fibrosis   | Unknown  | 4.5             | 3                  | Alive  | 49                 | No               |
| 26         | Cirrhosis       | VHC      | 5.8             | 3                  | Alive  | 48                 | Yes              |
| 27         | Cirrhosis       | VHC      | 5.5             | 2                  | Alive  | 22                 | No               |
| 28         | Cirrhosis       | NASH     | 2.5             | 2                  | Alive  | 38                 | Yes              |
| 29         | Cirrhosis       | Alcohol  | 3               | 3                  | Death  | 43                 | Yes              |
| 30         | Cirrhosis       | VHC      | 2.5             | 3                  | Alive  | 125                | Yes              |
| 31         | Mild Fibrosis   | Alcohol  | 3               | 3                  | Alive  | 121                | Yes              |
| 32         | No Fibrosis     | Unknown  | 27              | 3                  | Death  | 13                 | Yes              |
| 33         | Mild Fibrosis   | Unknown  | 7.5             | 3                  | Death  | 28                 | Yes              |

|    |               |         |     |   |       |     |     |
|----|---------------|---------|-----|---|-------|-----|-----|
| 34 | Cirrhosis     | VHC     | 3   | 3 | Death | 89  | No  |
| 35 | Cirrhosis     | Unknown | 6   | 2 | Death | 109 | No  |
| 36 | Cirrhosis     | VHC     | 2.5 | 2 | Alive | 111 | No  |
| 37 | Mild Fibrosis | VHC     | 3.8 | 2 | Death | 81  | No  |
| 38 | Cirrhosis     | VHC     | 3.3 | 3 | Alive | 51  | Yes |
| 39 | Cirrhosis     | VHC     | 4.5 | 3 | Death | 66  | Yes |
| 40 | No Fibrosis   | Unknown | 3   | 2 | Alive | 106 | Yes |
| 41 | Mild Fibrosis | VHB     | 2.9 | 2 | Alive | 105 | No  |
| 42 | Cirrhosis     | VHC     | 2.8 | 2 | Alive | 105 | No  |
| 43 | Mild Fibrosis | VHC     | 3.5 | 3 | Alive | 94  | No  |
| 44 | Cirrhosis     | VHC     | 3.5 | 3 | Death | 35  | No  |
| 45 | Cirrhosis     | VHC     | 5   | 2 | Alive | 94  | Yes |
| 46 | No Fibrosis   | Unknown | 6.5 | 2 | Alive | 92  | No  |
| 47 | No Fibrosis   | Unknown | 20  | 1 | Alive | 87  | No  |
| 48 | Cirrhosis     | VHC     | 2.5 | 2 | Death | 47  | Yes |
| 49 | No Fibrosis   | VHB     | 9   | 3 | Death | 13  | Yes |
| 50 | Mild Fibrosis | NASH    | 4.2 | 3 | Death | 30  | Yes |
| 51 | No Fibrosis   | Unknown | 8.3 | 3 | Death | 8   | Yes |
| 52 | Cirrhosis     | Alcohol | 2.6 | 2 | Alive | 77  | No  |
| 53 | Cirrhosis     | Alcohol | 2.3 | 2 | Death | 60  | No  |
| 54 | Cirrhosis     | VHC     | 2.3 | 2 | Alive | 29  | Yes |
| 55 | Mild Fibrosis | Alcohol | 1.9 | 2 | Alive | 67  | No  |
| 56 | No Fibrosis   | VHC     | 4.7 | 2 | Alive | 64  | No  |
| 57 | Cirrhosis     | VHC     | 2.5 | 4 | Alive | 64  | Yes |
| 58 | Cirrhosis     | VHC     | 3   | 2 | Alive | 64  | Yes |
| 59 | Cirrhosis     | Unknown | 2.8 | 2 | Alive | 62  | No  |
| 60 | Cirrhosis     | VHC     | 2.5 | 2 | Death | 13  | Yes |
| 61 | Cirrhosis     | VHB     | 4.9 | 4 | Death | 6   | Yes |
| 62 | Cirrhosis     | VHC     | 8.5 | 3 | Death | 15  | Yes |
| 63 | No Fibrosis   | VHC     | 2.5 | 4 | Alive | 75  | No  |
| 64 | Cirrhosis     | VHC     | 5.5 | 3 | Alive | 75  | Yes |
| 65 | Cirrhosis     | Alcohol | 1.4 | 2 | Alive | 73  | No  |
| 66 | No Fibrosis   | Alcohol | 7   | 2 | Alive | 53  | Yes |
| 67 | Cirrhosis     | Alcohol | 16  | 2 | Alive | 22  | Yes |
| 68 | No Fibrosis   | Unknown | 3.5 | 1 | Alive | 45  | No  |
| 69 | Cirrhosis     | VHC     | 1.5 | 3 | Alive | 44  | No  |
| 70 | Mild Fibrosis | VHC     | 9   | 3 | Alive | 41  | No  |

|     |               |         |     |   |       |    |     |
|-----|---------------|---------|-----|---|-------|----|-----|
| 71  | No Fibrosis   | Unknown | 4.8 | 3 | Death | 16 | Yes |
| 72  | Cirrhosis     | VHC     | 2.8 | 4 | Death | 23 | Yes |
| 73  | Cirrhosis     | VHC     | 3.7 | 2 | Alive |    | No  |
| 74  | Cirrhosis     | VHB     | 3.3 | 2 | Death | 12 | Yes |
| 75  | Cirrhosis     | Alcohol | 2.6 | 1 | Alive | 25 | No  |
| 76  | No Fibrosis   | Unknown |     |   |       |    |     |
| 77  | No Fibrosis   | Unknown | 12  | 2 | Alive | 35 | No  |
| 78  | Cirrhosis     | Alcohol | 2.8 | 2 | Alive | 20 | Yes |
| 79  | No Fibrosis   | Unknown | 11  | 2 | Alive | 20 | Yes |
| 80  | Cirrhosis     | Unknown | 4.5 | 2 | Alive | 18 | No  |
| 81  | No Fibrosis   | Unknown | 3.5 | 2 | Alive | 18 | No  |
| 82  | Mild Fibrosis | Unknown | 7.5 | 3 | Alive | 17 | Yes |
| 83  | Cirrhosis     | Alcohol | 4   | 2 | Alive | 16 | No  |
| 84  | No Fibrosis   | Unknown | 8.6 | 2 | Alive | 16 | No  |
| 85  | Cirrhosis     | Alcohol | 2   | 2 | Alive | 15 | No  |
| 86  | Mild Fibrosis | Alcohol | 3   | 3 | Alive | 15 | Yes |
| 87  | Cirrhosis     | Alcohol | 3.7 | 3 | Alive | 15 | Yes |
| 88  | No Fibrosis   | Unknown | 5.5 | 2 | Alive | 13 | No  |
| 89  | Cirrhosis     | VHC     | 2.5 | 2 | Alive | 9  | No  |
| 90  | Cirrhosis     | Alcohol | 1   | 2 | Alive | 80 | Yes |
| 91  | No Fibrosis   | VHC     | 3.5 | 2 | Alive |    | Yes |
| 92  | Cirrhosis     | VHC     | 2.5 | 1 | Alive | 45 | No  |
| 93  | Cirrhosis     | VHC     | 3.8 | 2 | Alive | 44 | No  |
| 94  | Cirrhosis     | VHC     | 2.2 | 2 | Alive | 42 | No  |
| 95  | Cirrhosis     | VHC     | 1.2 | 2 | Alive | 38 | No  |
| 96  | Cirrhosis     | Alcohol | 1.7 | 2 | Alive | 37 | No  |
| 97  | Cirrhosis     | VHB     | 3   | 3 | Death | 7  | Yes |
| 98  | Mild Fibrosis | VHC     | 5.2 | 3 | Alive | 35 | Yes |
| 99  | Mild Fibrosis | Alcohol | 6   | 4 | Alive | 35 | No  |
| 100 | Cirrhosis     | VHB     | 3   | 4 | Alive | 29 | Yes |
| 101 | Cirrhosis     | VHC     | 1.8 | 2 | Alive | 27 | Yes |
| 102 | Cirrhosis     | VHC     | 3.5 | 3 | Alive | 24 | Yes |
| 103 | Cirrhosis     | Alcohol | 2   | 2 | Alive | 21 | No  |
| 104 | No Fibrosis   | Unknown | 6.5 | 2 | Alive | 21 | No  |
| 105 | Cirrhosis     | Alcohol | 4.5 | 3 | Alive | 21 | No  |
| 106 | No Fibrosis   | Unknown | 6.7 | 2 | Alive | 20 | No  |
| 107 | Cirrhosis     | VHB     | 4.7 | 3 | Alive | 19 | Yes |

|     |               |         |     |   |       |    |     |
|-----|---------------|---------|-----|---|-------|----|-----|
| 108 | Mild Fibrosis | Unknown | 8   | 2 | Alive | 17 | No  |
| 109 | Mild Fibrosis | Unknown | 9   | 2 | Alive | 17 | Yes |
| 110 | Cirrhosis     | VHC     | 1.5 | 2 | Alive | 15 | No  |
| 111 | No Fibrosis   | Unknown | 7.5 | 1 | Alive | 14 | No  |
| 112 | No Fibrosis   | Unknown | 5   | 1 | Alive | 13 | No  |
| 113 | Cirrhosis     | NASH    | 2.5 | 2 | Alive | 13 | No  |
| 114 | No Fibrosis   | Unknown | 4.5 | 2 | Alive | 10 | No  |
| 115 | Cirrhosis     | VHC     | 2.8 | 2 | Alive | 12 | No  |
| 116 | No Fibrosis   | Unknown | 9   | 2 | Alive | 9  | No  |
| 117 | No Fibrosis   | VHB     | 3.8 | 2 | Alive | 9  | No  |
| 118 | Cirrhosis     | VHC     | 1.3 | 2 | Alive | 10 | No  |
| 119 | No Fibrosis   | Unknown | 4   | 2 | Alive | 10 | No  |
| 120 | Cirrhosis     | VHC     | 4.3 | 2 | Alive | 8  | Yes |
| 121 | Cirrhosis     | VHC     | 4   | 2 | Alive | 8  | No  |

**HBV:** Hepatitis B virus; **HCV:** Hepatitis C virus; **NASH:** Non Alcoholic SteatoHepatitis

**Supplementary Table 2. Antibodies and conditions used in this study.**

| Primary antibody            | Secondary antibody | Working dilution | Application | Reference              |
|-----------------------------|--------------------|------------------|-------------|------------------------|
| <b>AKT</b>                  | Rabbit             | 1:1000           | WB          | Cell Signaling #9272   |
| <b>ATPb</b>                 | Mouse              | 1:1000           | WB          | Abcam #ab556467        |
| <b>Bcl-xL</b>               | Mouse              | 1:1000           | WB          | BD Biosciences #610746 |
| <b>Calreticulin</b>         | Mouse              | 1:1000           | WB          | Abcam #ab22683         |
| <b>CYCLIN D1</b>            | Mouse              | 1:500            | WB          | BD Biosciences #556470 |
| <b>E-Cadherin</b>           | Mouse              | 1:50             | IF          | BD Biosciences #610182 |
| <b>EGFR</b>                 | Rabbit             | 1:1000           | WB          | Cell Signaling #2232   |
| <b>GAPDH</b>                | Mouse              | 1:1000           | WB          | Milipore #MAB374       |
| <b>Hic-5</b>                | Mouse              | 1:50             | IF          | BD Biosciences #611165 |
| <b>Histone 3</b>            | Rabbit             | 1:1000           | WB          | Abcam # ab1791         |
| <b>Hsp27</b>                | Mouse              | 1:1000           | WB          | Cell Signaling #2402   |
| <b>MCL1</b>                 | Mouse              | 1:1000           | WB          | Santa Cruz #sc-12756   |
| <b>MYC</b>                  | Rabbit             | 1:1000           | WB          | Abcam #ab32072         |
| <b>NOX4</b>                 | Rabbit             | 1:1000           | WB          | Prosci #7927           |
| <b>NOX4</b>                 | Rabbit             | 1:1000           | WB/IF       | Abcam #ab62352         |
| <b>pAKT (Ser473)</b>        | Rabbit             | 1:1000           | WB          | Cell Signaling #4060   |
| <b>pEGFR (Tyr1068)</b>      | Rabbit             | 1:1000           | WB          | Cell Signaling #3777   |
| <b>Phalloidin</b>           | -                  | 1:500            | IF          | Sigma #P1951           |
| <b>pSMAD 2 (Ser465/467)</b> | Rabbit             | 1:1000           | WB          | Cell Signaling #3108   |
| <b>pSMAD 3 (Ser423/425)</b> | Rabbit             | 1:1000           | WB          | Milipore #07-1389      |
| <b>SMAD 2</b>               | Mouse              | 1:1000           | WB          | Cell Signaling #3103   |
| <b>SMAD 3</b>               | Rabbit             | 1:1000           | WB          | Abcam #ab40854         |
| <b>Vinculin</b>             | Mouse              | 1:50             | IF          | Sigma #V9131           |
| <b>β-ACTIN</b>              | Mouse              | 1:3000           | WB          | Sigma #A5441           |

**Supplementary Table 3. Primer sequences used in LightCycler 480 Sybr Green System quantitative PCR.**

| Gene            | Forward (5'-3')             | Reverse (3'-5')            |
|-----------------|-----------------------------|----------------------------|
| <b>BCL2L1</b>   | CCTGCCTGCCTTTGCCTAA         | CCCGGTTGCTCTGAGACATT       |
| <b>BCL2L11</b>  | TAAGTTCTGAGTGTGACCGAGA      | GCTCTGTCTGTAGGGAGGTAGG     |
| <b>BMF</b>      | CAAATCTGAACAAGCCCAAGTCTCCAG | CACACAGCTTAGTGAGCAGAACACAA |
| <b>CCND1</b>    | AGCTGTGCATCTACACCGAC        | GAAATCGTGCGGGGTCATTG       |
| <b>CDC42</b>    | CAGGGCAAGAGGATTATGACAG      | GTTATCTCAGGCACCCACTT       |
| <b>HPRT1</b>    | CCTGGCGTCGTGATTAGTGA        | CGAGCAAGACGTTCAAGTCCT      |
| <b>L32</b>      | AACGTCAAGGAGCTGGAAG         | GGGTTGGTGACTCTGATGG        |
| <b>MCL1</b>     | TGCTTCGGAAACTGGACATCA       | TAGCCACAAAGGCACCAAAAG      |
| <b>MMP9</b>     | ACCTCGAACTTTGACAGCGACA      | GATGCCATTCACGTCGTCCTTA     |
| <b>MYC</b>      | CCCGCTTCTCTGAAAGGCTCTC      | CTCTGCTGCTGCTGCTGGTAG      |
| <b>NOX4</b>     | GCAGGAGAACCAGGAGATTG        | CACTGAGAAGTTGAGGGCATT      |
| <b>RAC1</b>     | GCTTTTCCCTTGTGAGTCCTG       | CCTTCAGTTTCTCGATCGTGTC     |
| <b>RHOA</b>     | AGCTGGGCAGGAAGATTATG        | CGTTGGGACAGAAATGCTTG       |
| <b>RHOC</b>     | CAAGACGAGCACACCAGG          | AGCACTCAAGGTAGCCAAAG       |
| <b>SERPINE1</b> | TCTGCCCTCACCAACATTC         | GGTCATTCCCAGGTTCTCTAG      |
| <b>SMAD7</b>    | CGGACAACAAGAGTCAGCTGGT      | GTCCTGGAGTCCGGGTTGTC       |
| <b>SNAI1</b>    | GCTGCAGGACTCTAATCCAGAGTT    | GACAGAGTCCAGATGAGCATTG     |
| <b>SNAI2</b>    | ACACATTAGAACTCACACGGG       | TGGAGAAGTTTTGGAGCAG        |
| <b>TBP</b>      | CCGCCGGCTGTAACTTC           | AGAAACAGTGATGCTGGGTCA      |
| <b>VIM</b>      | CGTGAATACCAAGACCTGCTC       | GGAAAAGTTTTGGAAGAGGCAG     |

**Supplementary Table 4. TGF- $\beta$  signaling from Hallmarks of Cancer Signature gene members.**

|        |        |        |          |          |        |        |
|--------|--------|--------|----------|----------|--------|--------|
| ACVR1  | CDK9   | HIPK2  | LTBP2    | RAB31    | SMAD6  | THBS1  |
| APC    | CDKN1C | ID1    | MAP3K7   | RHOA     | SMAD7  | TJP1   |
| ARID4B | CTNNB1 | ID2    | NCOR2    | SERPINE1 | SMURF1 | TRIM33 |
| BCAR3  | ENG    | ID3    | NOG      | SKI      | SMURF2 | UBE2D3 |
| BMP2   | FKBP1A | IFNGR2 | PMEPA1   | SKIL     | SPTBN1 | WWTR1  |
| BMPR1A | FNTA   | JUNB   | PPM1A    | SLC20A1  | TGFB1  | XIAP   |
| BMPR2  | FURIN  | KLF10  | PPP1CA   | SMAD1    | TGFBR1 |        |
| CDH1   | HDAC1  | LEFTY2 | PPP1R15A | SMAD3    | TGIF1  |        |
